# Supplementary material for: Virulence Determinants Are Required for Brain Abscess Formation Through Staphylococcus aureus Infection and Are Potential Targets of Antivirulence Factor Therapy
Source: PubMed Central journal article supplement (PMC6460967; doi:10.3389/fmicb.2019.00682), 2019-04-05

# Interactive 3D reconstruction of BA after PBS treatment

## To interact with the 3D reconstruction

Translate: Hold left and right mouse-buttons and move mouse.

Rotate: Hold left mouse-button and move mouse.

Zoom: Hold right mouse-button and move mouse up or down.

## Selection of preset views

The views panel which in the under-part contains several preset views.

Click to select such a view.

## Selection of structures

The structures panel of model tree in the left-part contains buttons for each structure to hide or show.

## Technical Notes

This PDF file is preferably viewed in Adobe Reader 9.3 or higher.

(<http://www.adobe.com/downloads/>)

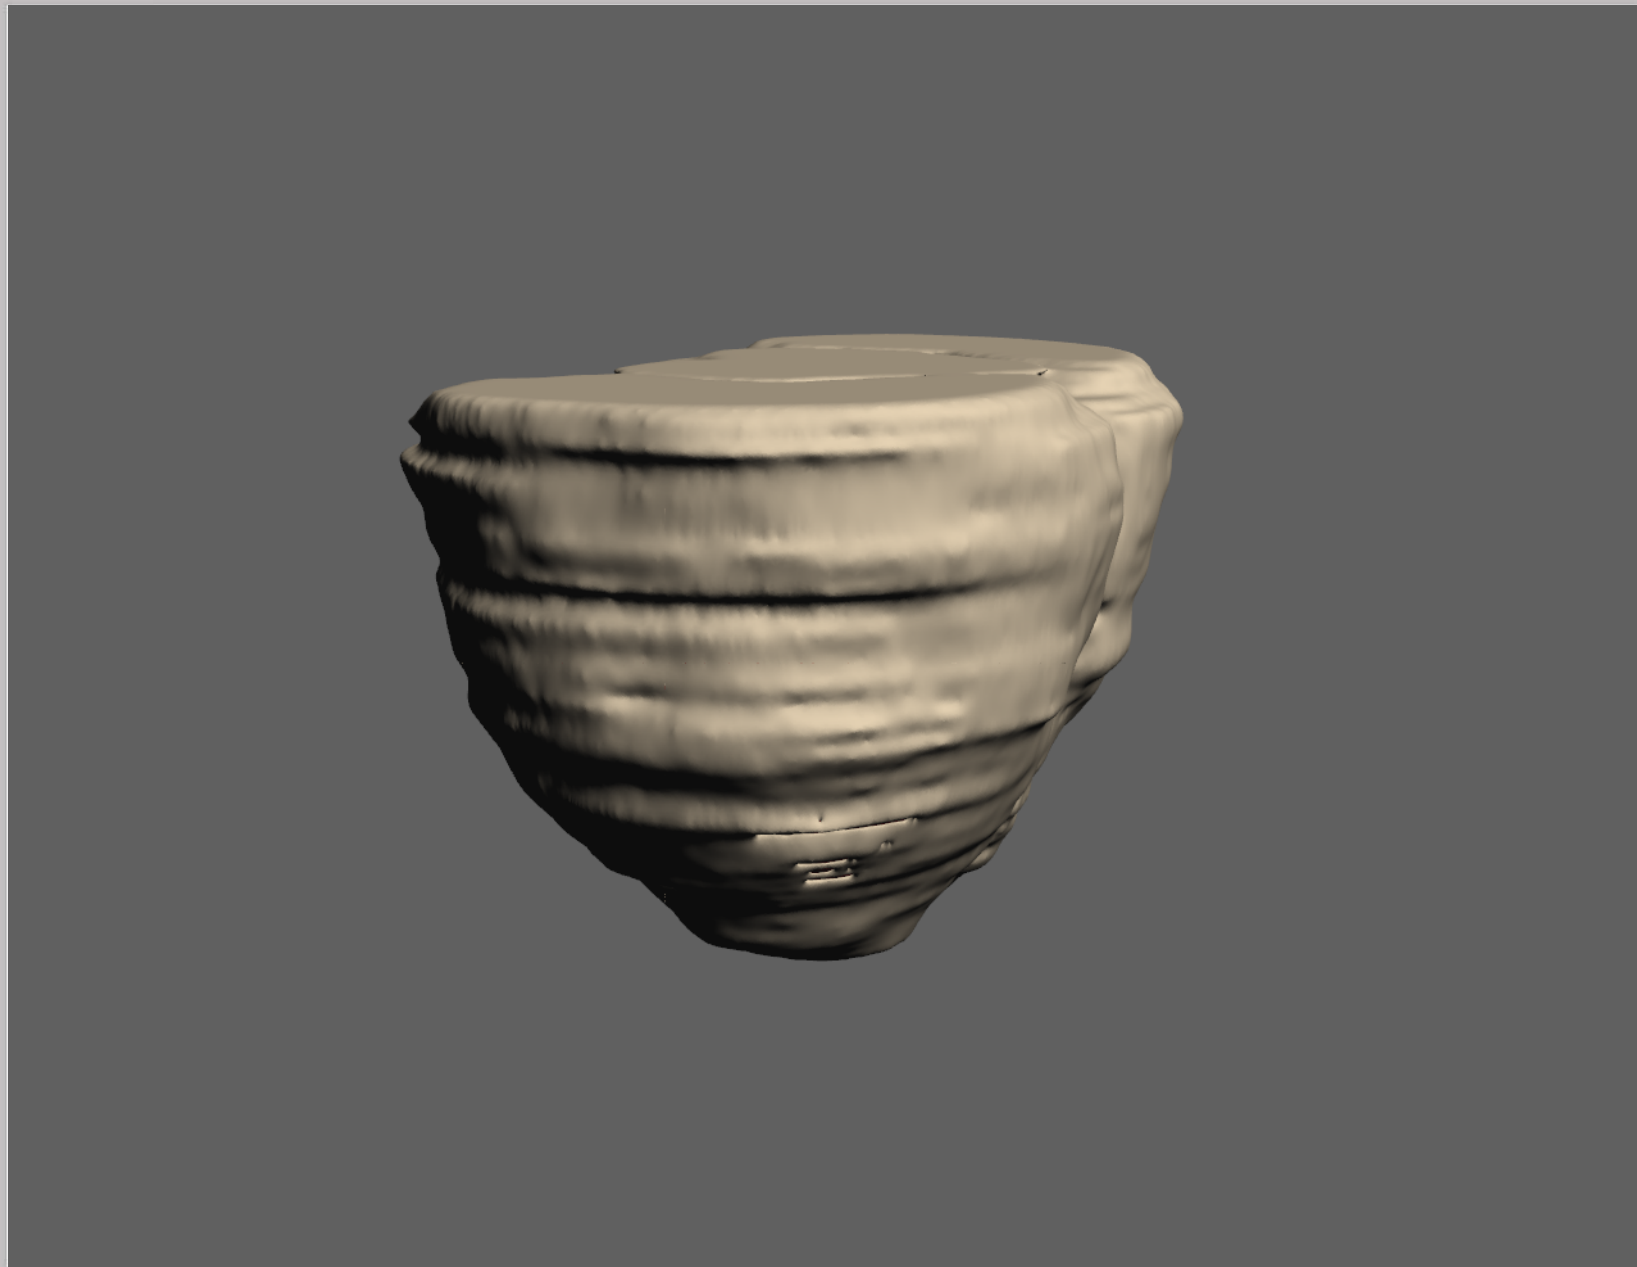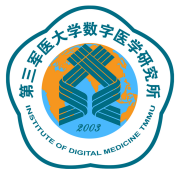

Department of Digital Medicine,  
Biomedical Engineering College,  
Third Military Medical University, Chongqing, China  
<http://szyxyjs.tmmu.edu.cn/index.htm>

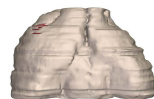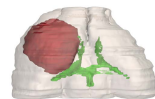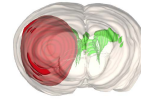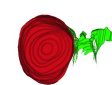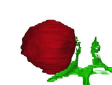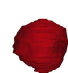

Supplement: Image_1.pdf [file Image_1.pdf]
